# Supplementary material for: Controllable construction of red thermally activated delayed fluorescence molecules based on a spiro-acridine donor
Source: Royal Society of Chemistry journal article supplement (doi:10.1039/d2cp05084f), 2022-12-07
Supplement: d2cp05084f1.pdf [file d2cp05084f1.pdf]

## *Supplementary Information*

### Controllable construction of red thermally activated delayed fluorescence molecules based on spiro-acridine donor

Huanling Liu<sup>1</sup>, Kai Zhang<sup>1</sup>, Haipei Zou<sup>1</sup>, Qingfang Mu<sup>1</sup>, Yuzhi Song<sup>1</sup>, Lili Lin<sup>1</sup>,  
Yuanyuan Xu<sup>3\*</sup>, Chuan-Kui Wang<sup>1\*</sup>, Jianzhong Fan<sup>1,2\*</sup>

1. Shandong Province Key Laboratory of Medical Physics and Image Processing Technology, Institute of Materials and Clean Energy, School of Physics and Electronics, Shandong Normal University, Jinan 250014, China.
2. Guangdong Provincial Key Laboratory of Luminescence from Molecular Aggregates (South China University of Technology), Guangzhou 510640, China.
3. School of Science, Qilu University of Technology (Shandong Academy of Sciences), Jinan 250353, China.

\*Author to whom correspondence should be addressed.

E-mail: [fanjianzhongvip@163.com](mailto:fanjianzhongvip@163.com) and [ckwang@sdu.edu.cn](mailto:ckwang@sdu.edu.cn)

## Contents:

### 1. Experimental measurements.

**Scheme S1:** Synthetic procedures of **BPCN-2spAc**.

**Figure S1:**  $^1\text{H}$  NMR spectrum (DMSO- $d_6$ , 300 MHz) of compound 1.

**Figure S2:**  $^1\text{H}$  NMR spectrum (DMSO- $d_6$ , 300 MHz) of compound 2.

**Figure S3:**  $^1\text{H}$  NMR spectrum ( $\text{C}_2\text{D}_4\text{Cl}_2$ , 400 MHz) of compound 3.

**Figure S4:** MALDI-TOF mass spectrum of BPCN-2spAc

**Figure S5:**  $^1\text{H}$  NMR spectrum ( $\text{CHCl}_3$ , 400 MHz) of BPCN-2spAc.

### 2. DFT calculations.

**Table S1:** Geometry parameters of  $S_0$ ,  $S_1$  and  $T_1$  states for TPCN-2spA and their differences ( $\Delta$ ). (Bond length: Å. Bond angle: °. Dihedral angle: °.)

**Table S2:** Geometry parameters of  $S_0$ ,  $S_1$  and  $T_1$  states for DPCN-2spA and their differences ( $\Delta$ ).

**Table S3:** Geometry parameters of  $S_0$ ,  $S_1$  and  $T_1$  states for BPCN-2spA and their differences ( $\Delta$ ).

**Figure S6.** The atomic labels and the interesting bond lengths ( $B_1$ ,  $B_2$  and  $B_3$ ), bond angles ( $\theta_1$  and  $\theta_2$ ) and the dihedral angles ( $\alpha_1$  and  $\alpha_2$ ) of (a) DQCN-2spAs, (b) TPCN-2spAs, (c) DPCN-2spAs and (d) BPCN-2spAs.

**Figure S7:** Isosurface distributions of holes and electrons and heat map of the  $S_1$  state for DQCN-2spAs, TPCN-2spAs, DPCN-2spAs and BPCN-2spAs in toluene.

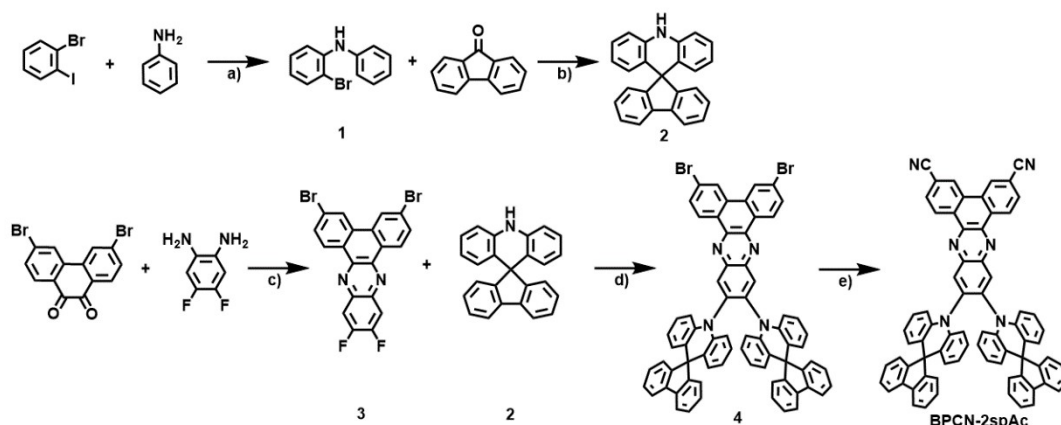

**Scheme S1.** Synthetic procedures of **BPCN-2spAc**: a)  $\text{Pd}_2(\text{dba})_3$ , DPPF, *t*-BuONa, Tol, 100 °C, 12 h; b) *n*-BuLi, -78 °C, 4h; RT, 12 h;  $\text{MeSO}_3\text{H}$ ,  $\text{CHCl}_3$ , 12 h; c)/i) AcOH, 120 °C, 12 h; d) NaH, 80 °C, 12 h; e)/j) CuCN, NMP, 180 °C, 6 h; f)  $\text{Na}_2\text{CO}_3$ , 2-nitropropane,  $\text{H}_2\text{O} : \text{CH}_3\text{CN} = 1 : 1$ , 80 °C, 4 h; g)  $\text{Pd}_2(\text{dba})_3$ ,  $\text{P}(\text{t-Bu})_3\text{H BF}_4$ , *t*-BuONa, Tol, 120 °C, 12 h; h) TsOH, Tol, 100 °C, 4h.

### 2-bromo-N-phenylaniline (1)

A mixture of aniline (4 g, 42.95 mmol), 1-bromo-2-iodobenzene (13.37 g, 47.2 mmol), *t*-BuONa (8.25 g, 85.90 mmol),  $\text{Pd}_2(\text{dba})_3$  (0.39g, 0.43 mmol) and DPPF (0.95g, 1.72 mmol) was dissolved in 80 mL dry toluene under nitrogen atmosphere. The reaction mixture was stirred at 100 °C for 12 h. After cooling to room temperature, the resulting solution was filtered through a Celite pad and removed the toluene, then extracted three with  $\text{CH}_2\text{Cl}_2$ . The oil liquid product (10.22 g) was obtained by column chromatography silica gel eluted with PE. Yield: 96.3 %.  $^1\text{H NMR}$  (300 MHz,  $\text{DMSO}-d_6$ )  $\delta$  7.59 (d,  $J = 7.9$  Hz, 1H), 7.51 (s, 1H), 7.27 – 7.19 (m, 4H), 7.04 (d,  $J = 7.9$  Hz, 2H), 6.91 – 6.82 (m, 2H).

### 10H-spiro[acridine-9,9'-fluorene] (2)

Compound 1 (4 g, 16.20 mmol) was added to 160 mL dry THF in flask and cooled to -78 °C under nitrogen atmosphere. A stirred solution was slowly added a solution of *n*-BuLi (22.3 mL, 35.63 mmol, 1.6 M in hexane) via syringe, and then reacted 4 hours

at this temperature. 9H-fluoren-9-one (3.5 g, 19.44 mmol) was quickly added to the solution for 30 minutes, then reacted 12 hours at room temperature. The reaction mixture was quenched by adding of 100 ml ice water. The THF was removed from the mixture, extracted three with CH<sub>2</sub>Cl<sub>2</sub>, and dried by Na<sub>2</sub>SO<sub>4</sub>. The dark oil was got and dissolved in 100 mL CHCl<sub>3</sub>, and methanesulfonic acid (1.2 mL, 17.82 mmol) was added at 65 °C for overnight. The resulting solution was cooled to room temperature and poured into NaHCO<sub>3</sub> aqueous solution to neutralize the acid, then extracted three with CH<sub>2</sub>Cl<sub>2</sub>. The crude product was purified by column chromatography silica gel eluted with PE/DCM (6/1, v/v) as a white solid (2.33 g). Yield: 43.47 %. <sup>1</sup>H NMR (300 MHz, DMSO-*d*<sub>6</sub>) δ 9.24 (s, 1H), 7.91 (d, *J* = 7.5 Hz, 2H), 7.36 (t, *J* = 7.3 Hz, 2H), 7.26 – 7.14 (m, 4H), 6.99 (dd, *J* = 21.0, 7.6 Hz, 4H), 6.48 (t, *J* = 7.4 Hz, 2H), 6.10 (d, *J* = 7.8 Hz, 2H).

### **3,6-dibromo-11,12-difluorodibenzo[a,c]phenazine (3)**

3,6-dibromophenanthrene-9,10-dione (0.89 g, 2.43mmol) and 4,5-difluorobenzene-1,2-diamine (0.35 g, 2.43mmol) were suspended in AcOH (30 mL) and heated at 120 °C overnight under nitrogen. The crude product was washed with water, then extracted three with CH<sub>2</sub>Cl<sub>2</sub> and recrystallized from ethanol as a orange solid (0.85 g). Purple solid (Yield: 73.86 %). <sup>1</sup>H NMR (400 MHz, C<sub>6</sub>D<sub>4</sub>Cl<sub>2</sub>) δ 9.28 (d, *J* = 8.5 Hz, 2H), 8.52 (s, 2H), 8.06 (t, *J* = 10.5 Hz, 2H), 7.92 (d, *J* = 8.4 Hz, 2H).

### **10,10''-(3,6-dibromodibenzo[a,c]phenazine-11,12-diyl)bis(10H-spiro[acridine-9,9'-fluorene]) (4)**

Compound 3 (0.5 g, 1.06 mmol), Compound 2 (0.86 g 2.33 mmol) and NaH (112 mg, 4.66 mmol) were added to dry DMF (30 mL) under nitrogen, and then stirred at 80 °C for 12h. After reaction completed, the solvent was removed from the mixture, and then extracted three with CH<sub>2</sub>Cl<sub>2</sub>. The crude product was purified by column chromatography silica gel eluted with PE/DCM (4/1, v/v) as a red solid (84 mg). Yield: 7.24 %. MALDI-TOF-MS: *m/z* calcd for C<sub>70</sub>H<sub>40</sub>Br<sub>2</sub>N<sub>4</sub>: 1096.16, found: 1097.233.

### **BPCN-2spAc**

Compound 4 (84 mg, 0.08mmol) and CuCN (18mg, 0.2 mmol) were suspended in 1-methyl-2-pyrrolidinone (20 mL). This reaction was carried out at 180 °C under microwave for 2 h. Removing the solvent by decompress distillation. The crude product was washed with aqueous solution of ferric chloride hexahydrate and then purified by column chromatography silica gel with PE/CH<sub>2</sub>Cl<sub>2</sub> (3/2, v/v) to obtain red solid (431 mg). Yield: 50.61 %. <sup>1</sup>H NMR (400 MHz, CDCl<sub>3</sub>) δ 9.64 (d, J = 8.3 Hz, 2H), 9.07 (s, 2H), 8.95 (d, J = 1.5 Hz, 2H), 8.15 (dd, J = 8.4, 1.4 Hz, 2H), 7.82 (d, J = 7.5 Hz, 2H), 7.57 (d, J = 7.5 Hz, 2H), 7.51 – 7.33 (m, 6H), 6.97 – 6.89 (m, 4H), 6.88 – 6.73 (m, 6H), 6.59 (td, J = 7.5, 7.1, 1.1 Hz, 4H), 6.38 (dd, J = 7.8, 1.6 Hz, 4H), 5.91 (td, J = 7.5, 1.1 Hz, 2H). MALDI-TOF-MS: m/z calcd for C<sub>72</sub>H<sub>40</sub>N<sub>6</sub>: 988.33, found: 987.358.

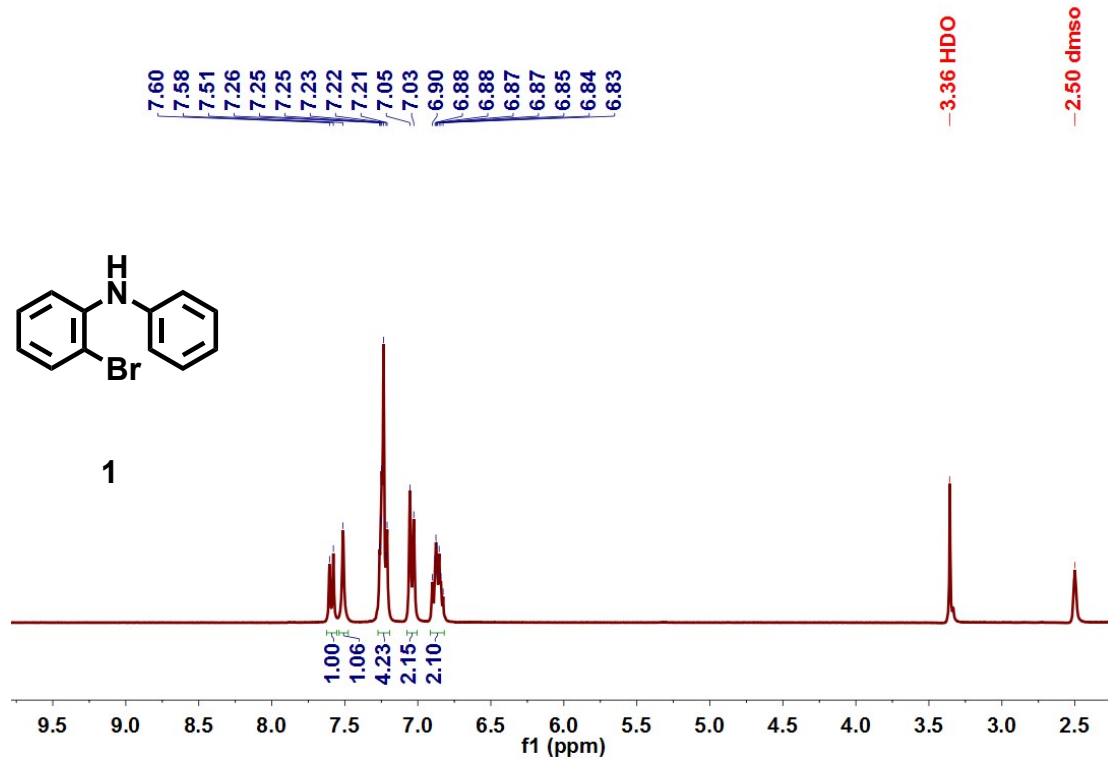

Figure S1 <sup>1</sup>H NMR spectrum (DMSO-*d*<sub>6</sub>, 300 MHz) of compound 1.

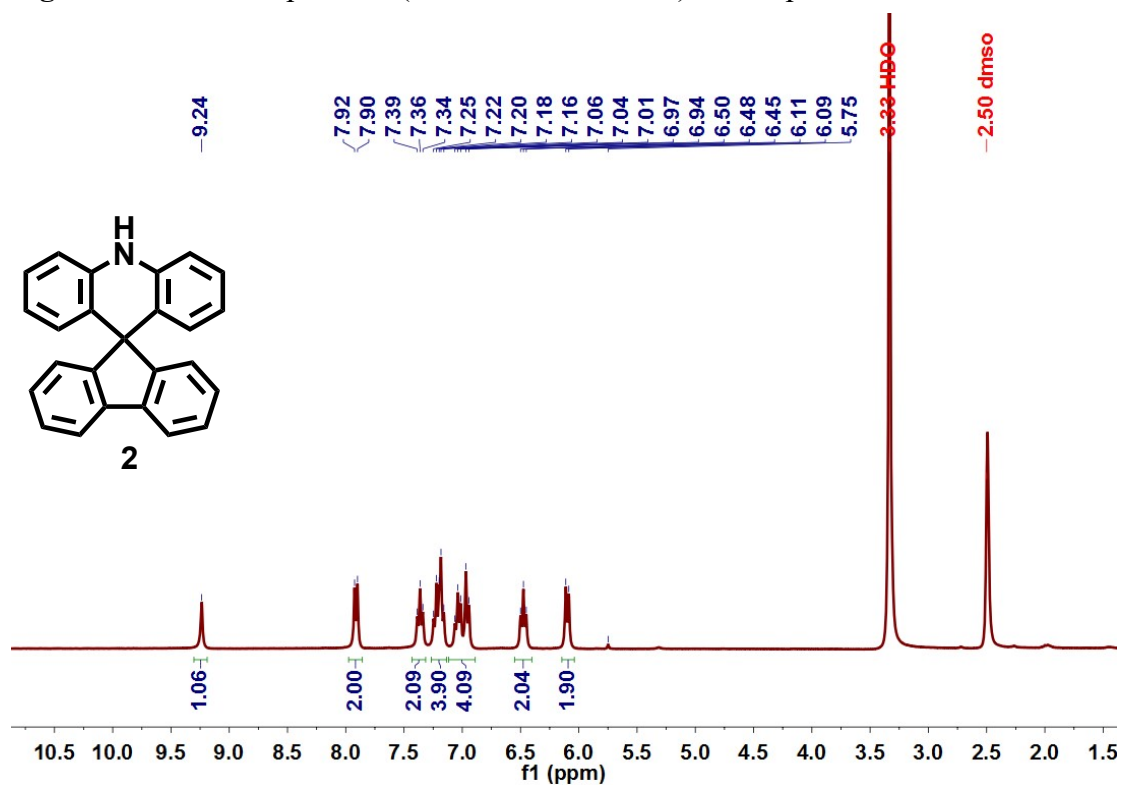

Figure S2 <sup>1</sup>H NMR spectrum (DMSO-*d*<sub>6</sub>, 300 MHz) of compound 2.

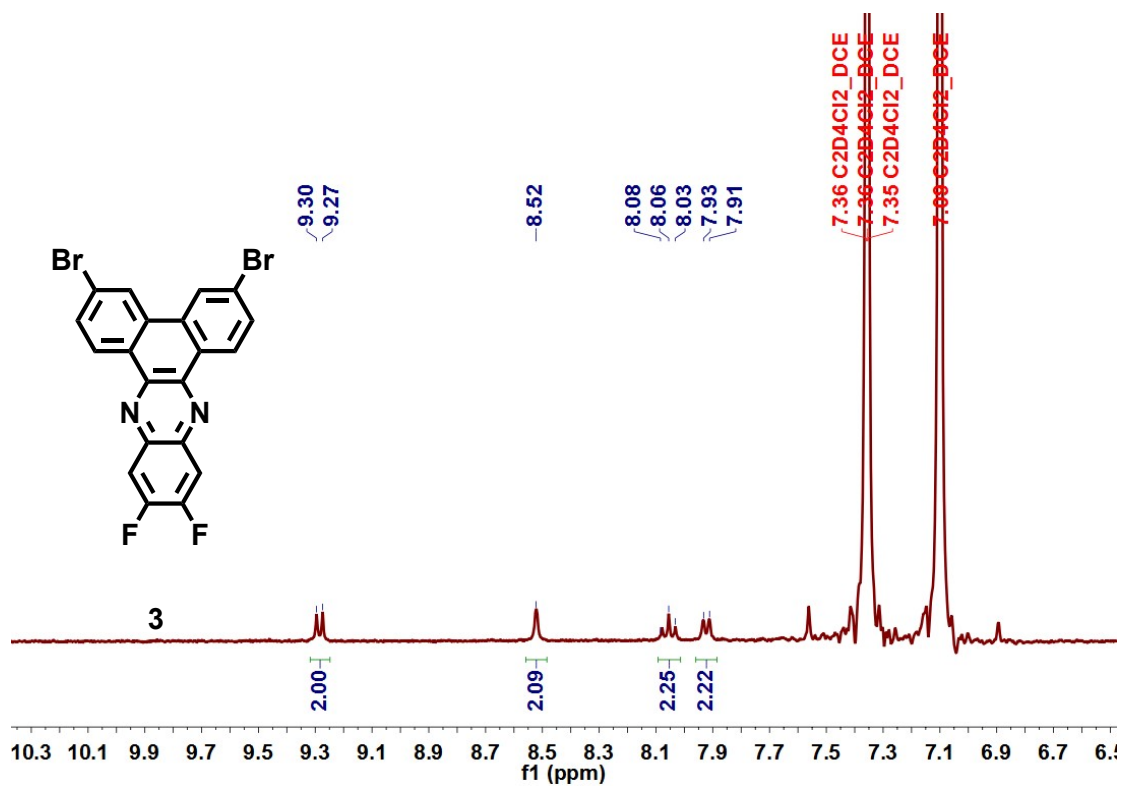

Figure S3  $^1\text{H}$  NMR spectrum ( $\text{C}_2\text{D}_4\text{Cl}_2$ , 400 MHz) of compound 3.

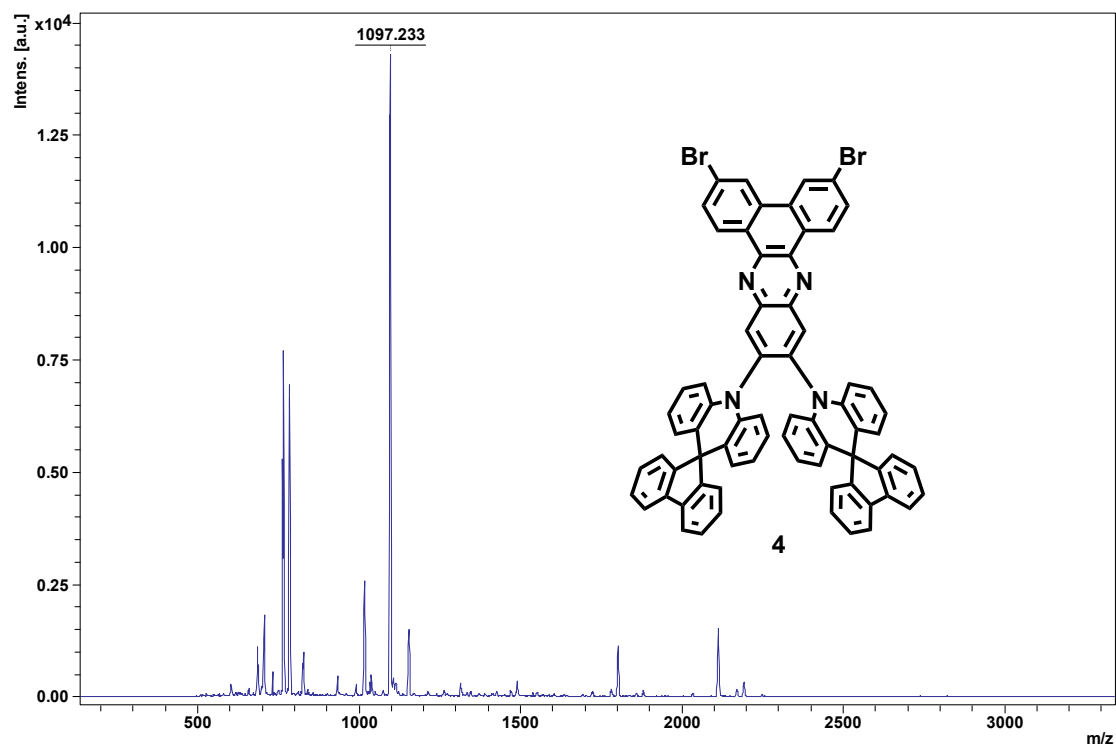

Figure S4 MALDI-TOF mass spectrum of BPCN-2spAc

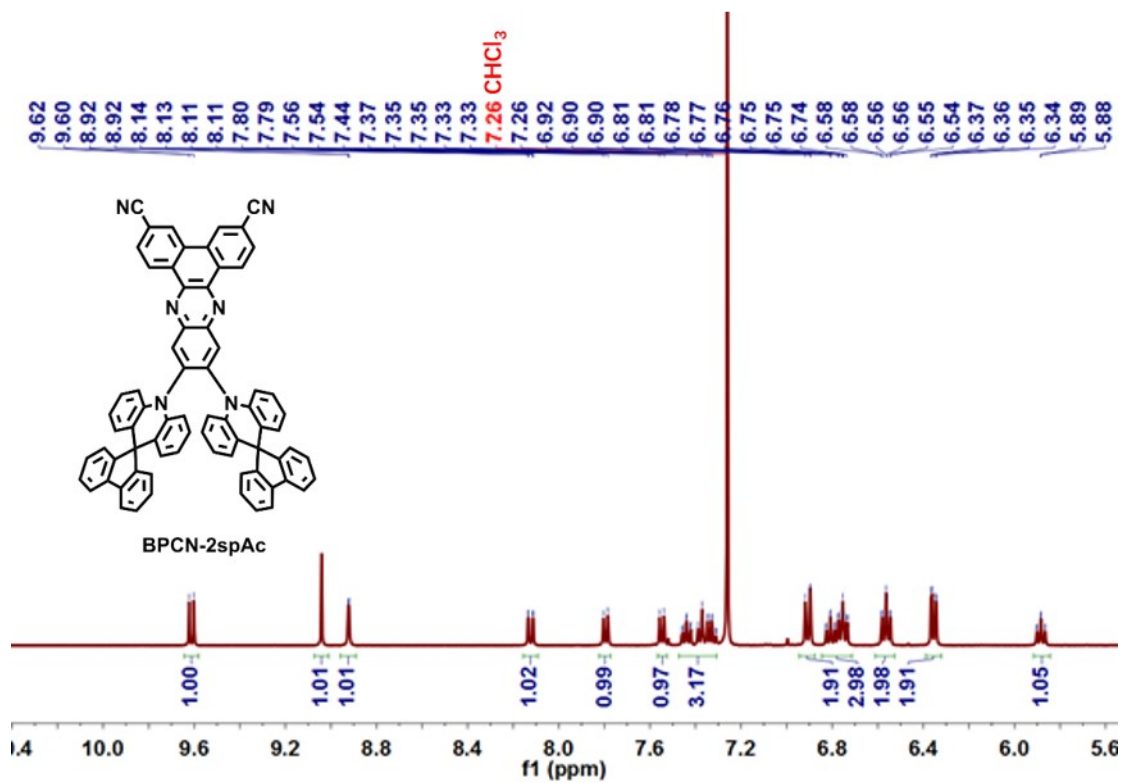



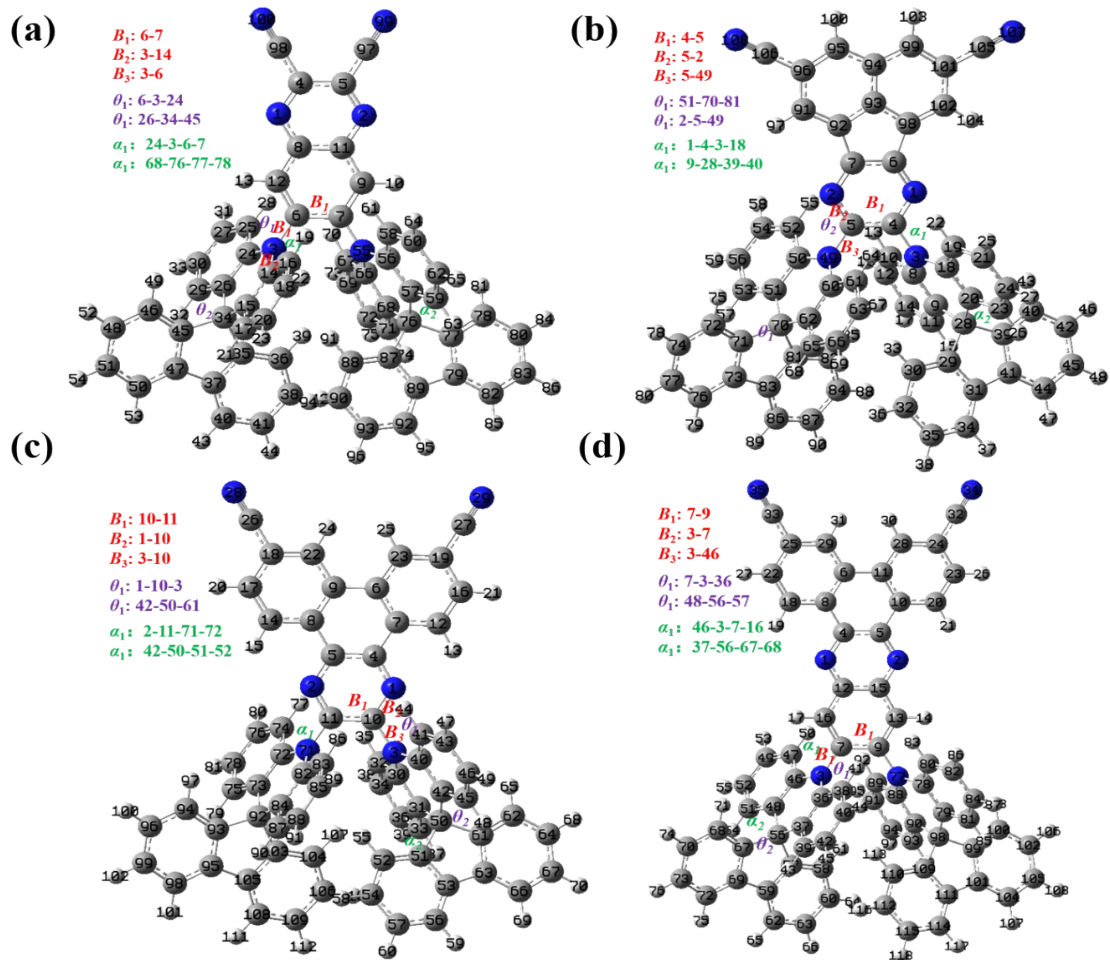

**Figure S6.** The atomic labels and the interesting bond lengths ( $B_1$ ,  $B_2$  and  $B_3$ ), bond angles ( $\theta_1$  and  $\theta_2$ ) and the dihedral angles ( $\alpha_1$  and  $\alpha_2$ ) of (a) DQCn-2spAs, (b) TPCN-2spAs, (c) DPCN-2spAs and (d) BPCN-2spAs.

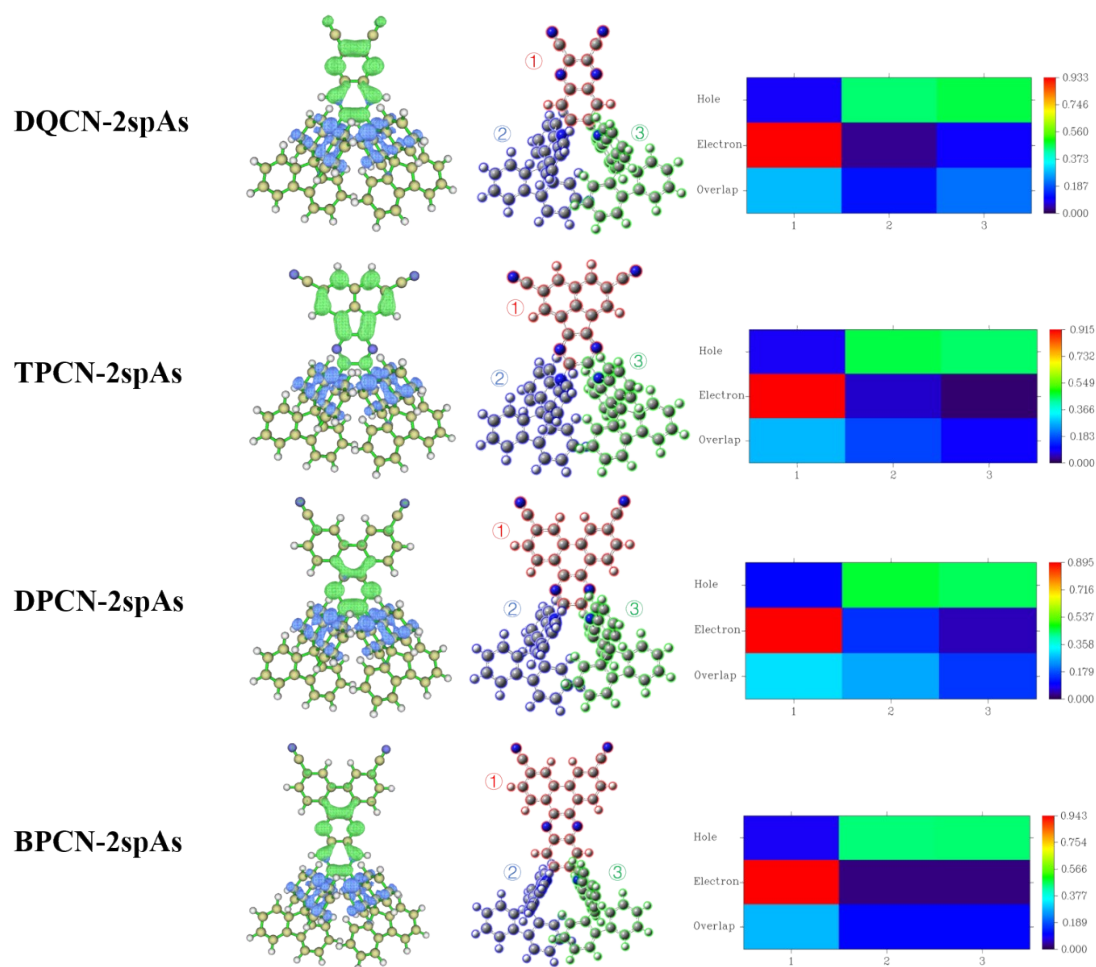

**Figure S7.** Isosurface distributions of holes and electrons and heat map of the  $S_1$  state for DQCN-2spAs, TPCN-2spAs, DPCN-2spAs and BPCN-2spAs in toluene.

**Table S1** Geometry parameters of  $S_0$ ,  $S_1$  and  $T_1$  states for TPCN-2spA and their differences ( $\Delta$ ). (Bond length: Å. Bond angle: °. Dihedral angle: °.)

|                       | Geometry   | Atomic number | $S_0$   | $S_1$   | $T_1$   | $\Delta S_0 - S_1 $ | $\Delta S_1 - T_1 $ |
|-----------------------|------------|---------------|---------|---------|---------|---------------------|---------------------|
| <b>Bond length</b>    | $B_1$      | 4-5           | 1.415   | 1.404   | 1.425   | 0.011               | 0.021               |
|                       | $B_2$      | 5-2           | 1.330   | 1.320   | 1.319   | 0.010               | 0.001               |
|                       | $B_3$      | 5-49          | 1.409   | 1.433   | 1.420   | 0.024               | 0.013               |
| <b>Bond angle</b>     | $\theta_1$ | 51-70-81      | 110.597 | 110.928 | 110.926 | 0.331               | 0.002               |
|                       | $\theta_2$ | 2-5-49        | 116.583 | 116.546 | 116.455 | 0.037               | 0.091               |
| <b>Dihedral angle</b> | $\alpha_1$ | 1-4-3-18      | 59.829  | 71.814  | 62.056  | 11.985              | 9.758               |
|                       | $\alpha_2$ | 9-28-39-40    | 62.630  | 62.241  | 62.288  | 0.389               | 0.047               |

**Table S2** Geometry parameters of  $S_0$ ,  $S_1$  and  $T_1$  states for DPCN-2spA and their differences ( $\Delta$ ). (Bond length: Å. Bond angle: °. Dihedral angle: °.)

|                       | Geometry   | Atomic number | $S_0$   | $S_1$   | $T_1$   | $\Delta S_0 - S_1 $ | $\Delta S_1 - T_1 $ |
|-----------------------|------------|---------------|---------|---------|---------|---------------------|---------------------|
| <b>Bond length</b>    | $B_1$      | 10-11         | 1.425   | 1.369   | 1.373   | 0.056               | 0.004               |
|                       | $B_2$      | 1-10          | 1.310   | 1.339   | 1.340   | 0.029               | 0.001               |
|                       | $B_3$      | 3-10          | 1.407   | 1.437   | 1.389   | 0.030               | 0.048               |
| <b>Bond angle</b>     | $\theta_1$ | 1-10-3        | 117.493 | 115.803 | 115.591 | 1.690               | 0.212               |
|                       | $\theta_2$ | 42-50-61      | 111.359 | 110.823 | 110.853 | 0.536               | 0.030               |
| <b>Dihedral angle</b> | $\alpha_1$ | 2-11-71-72    | 58.880  | 73.929  | 68.701  | 15.049              | 5.228               |
|                       | $\alpha_2$ | 42-50-51-52   | 60.823  | 59.215  | 60.103  | 1.608               | 0.888               |

**Table S3** Geometry parameters of  $S_0$ ,  $S_1$  and  $T_1$  states for BPCN-2spA and their differences ( $\Delta$ ). (Bond length: Å. Bond angle: °. Dihedral angle: °.)

|                       | <b>Geometry</b> | <b>Atomic number</b> | <b><math>S_0</math></b> | <b><math>S_1</math></b> | <b><math>T_1</math></b> | <b><math>\Delta S_0 - S_1 </math></b> | <b><math>\Delta S_1 - T_1 </math></b> |
|-----------------------|-----------------|----------------------|-------------------------|-------------------------|-------------------------|---------------------------------------|---------------------------------------|
| <b>Bond length</b>    | $B_1$           | 7-9                  | 1.437                   | 1.399                   | 1.405                   | 0.038                                 | 0.006                                 |
|                       | $B_2$           | 3-7                  | 1.417                   | 1.445                   | 1.417                   | 0.028                                 | 0.028                                 |
|                       | $B_3$           | 3-46                 | 1.407                   | 1.378                   | 1.393                   | 0.029                                 | 0.015                                 |
| <b>Bond angle</b>     | $\theta_1$      | 7-3-36               | 119.193                 | 120.404                 | 120.125                 | 1.211                                 | 0.279                                 |
|                       | $\theta_2$      | 48-56-57             | 110.428                 | 110.087                 | 109.942                 | 0.341                                 | 0.145                                 |
| <b>Dihedral angle</b> | $\alpha_1$      | 46-3-7-16            | 62.398                  | 74.532                  | 60.983                  | 12.134                                | 13.549                                |
|                       | $\alpha_2$      | 37-56-67-68          | 62.412                  | 62.483                  | 62.955                  | 0.071                                 | 0.472                                 |
